# Supplementary material for: Inhibitors of the Ubiquitin-Mediated Signaling Pathway Exhibit Broad-Spectrum Antiviral Activities against New World Alphaviruses
Source: MDPI journal article supplement (doi:10.3390/v15030655), 2023-02-28

**Figure S1.** Cell viability of Selected 5 inhibitors in Human microglial (HMC3) and astroglial (SVG-p12) cells.

**(A)**

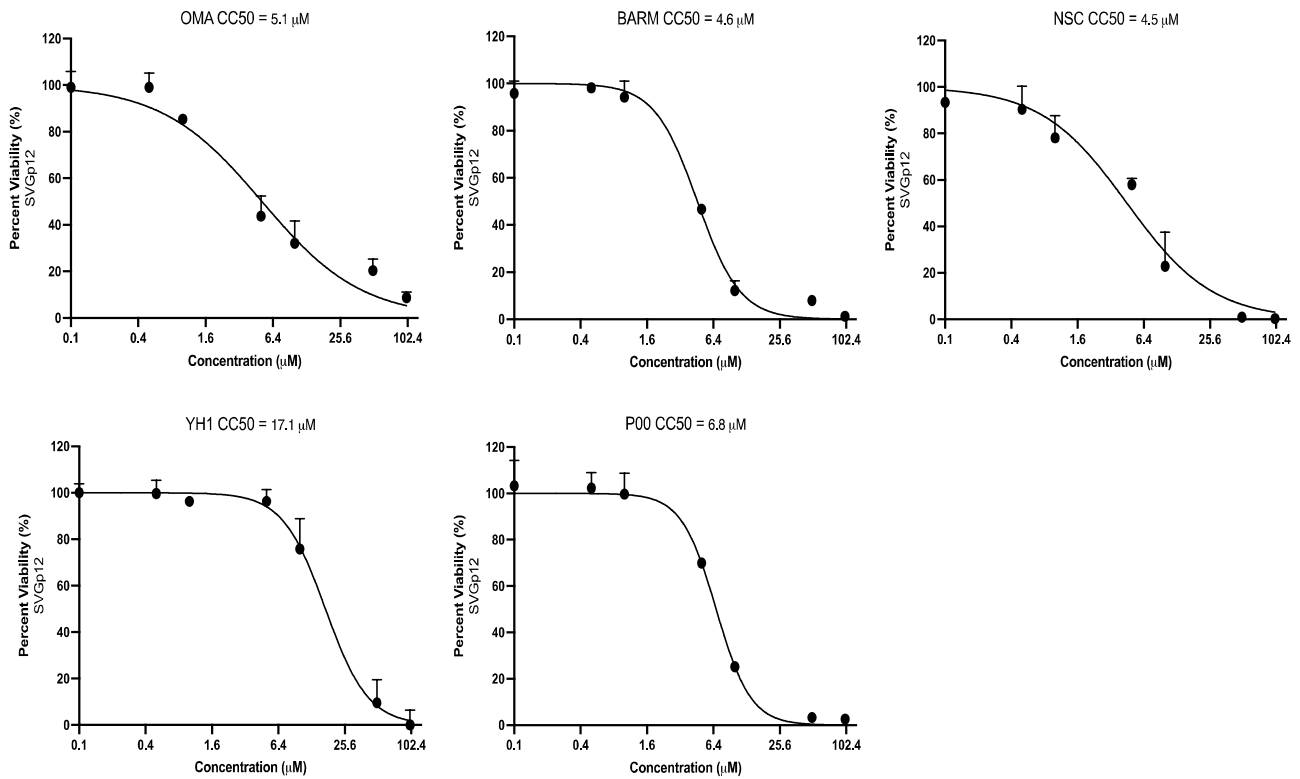

**(B)**

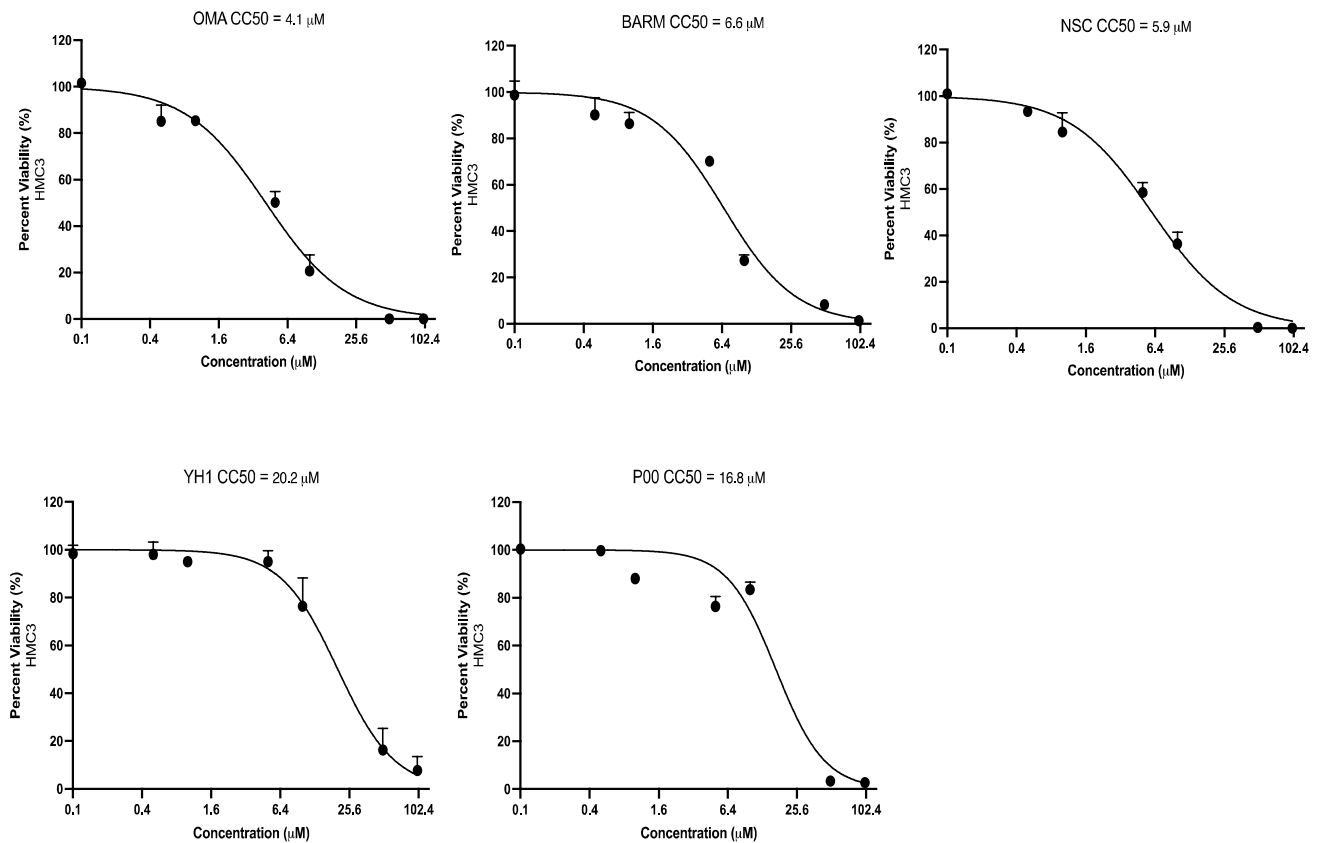

**Figure S2.** Inhibitors of UPS-mediated signaling inhibit VEEV-TC83 in infected microglial (HMC3) and astroglial (SVG-p12) cells.

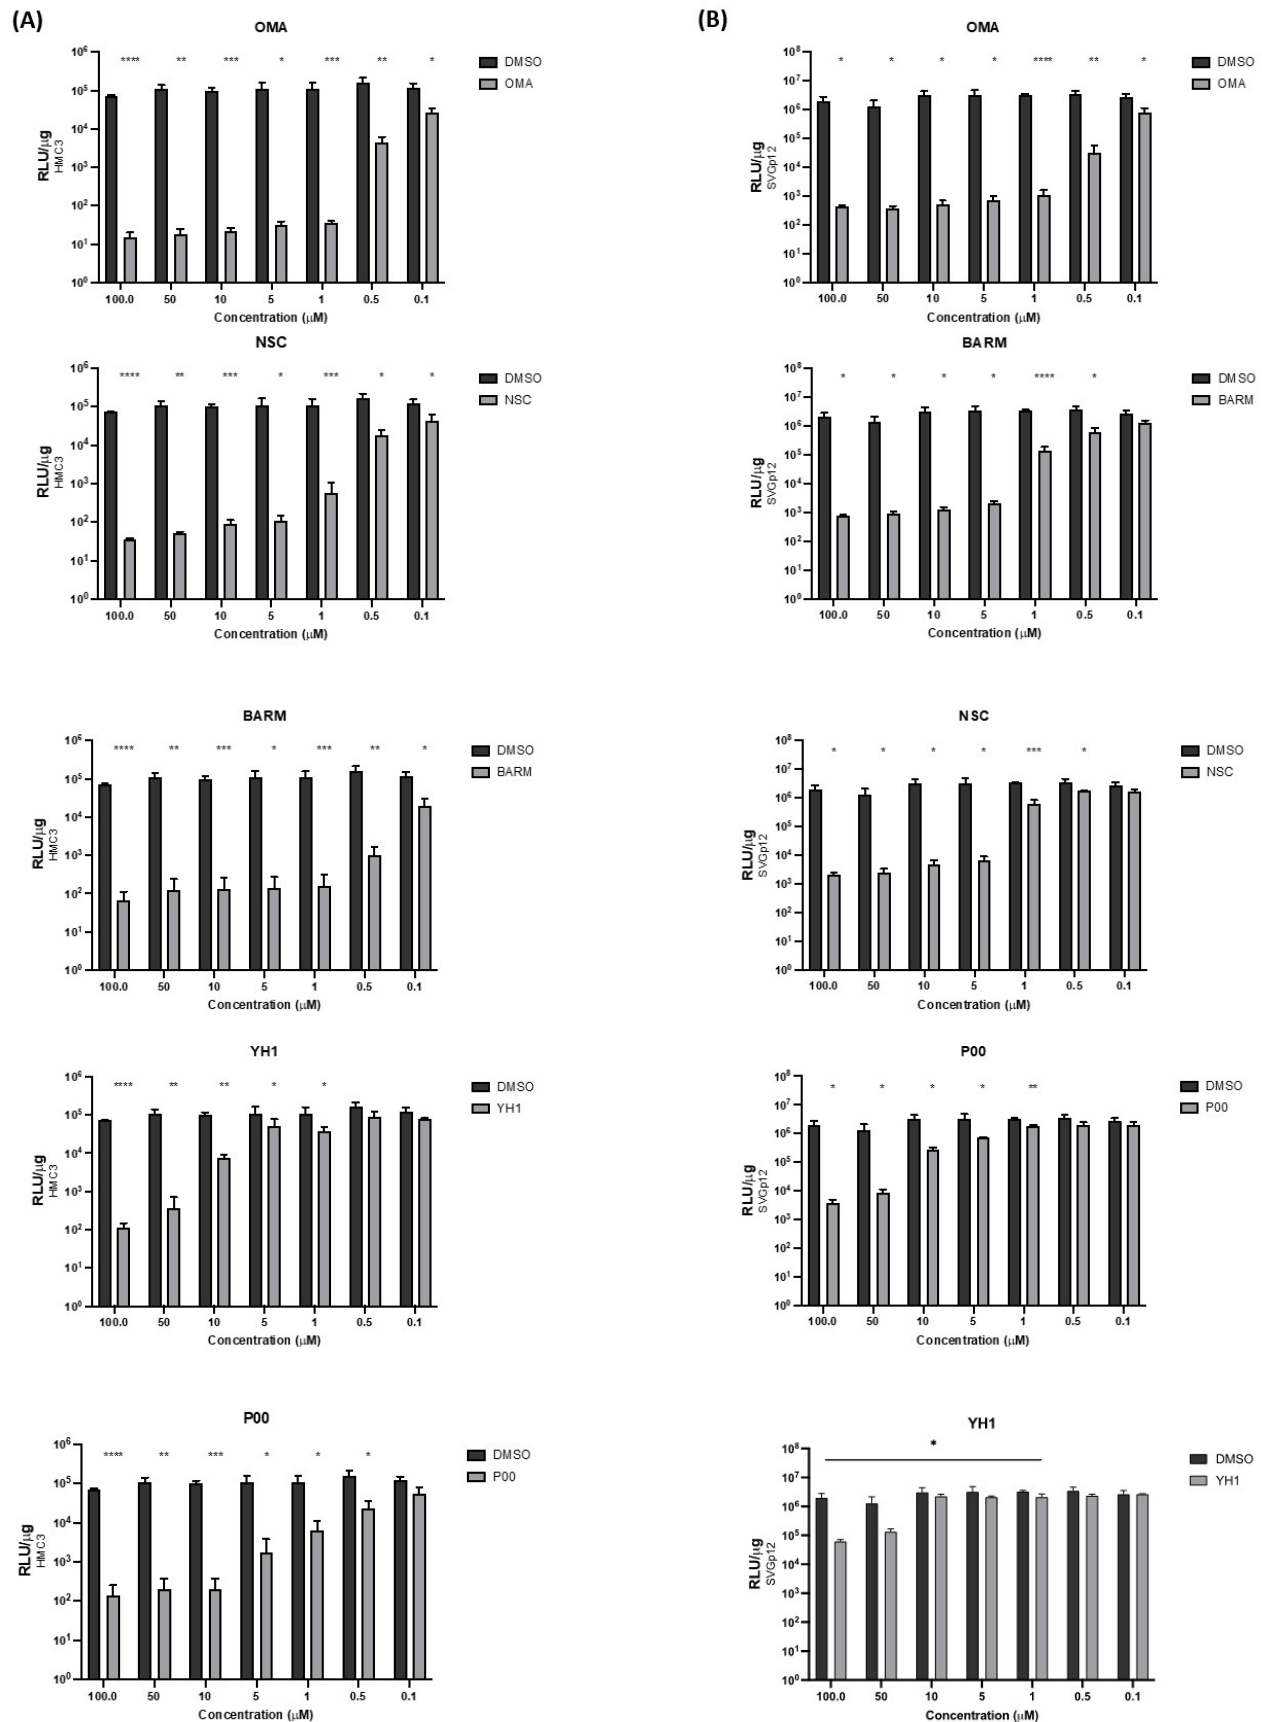

**Figure S3.** OMA, BARM, and NSC demonstrate inhibition of VEEV-TC83 infectious titer at Moi of 1.

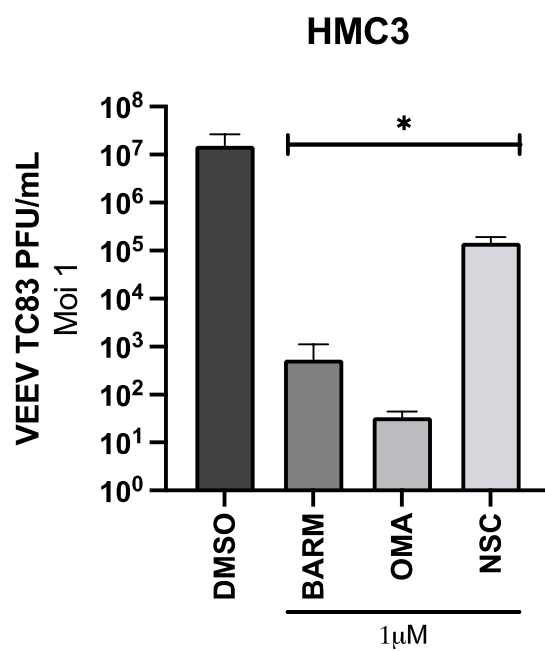

**Figure S4.** Effect of OMA, BARM, and NSC treatment on expression of proinflammatory cytokines in the supernatants of VEEV-TC83-infected HMC3 cells.

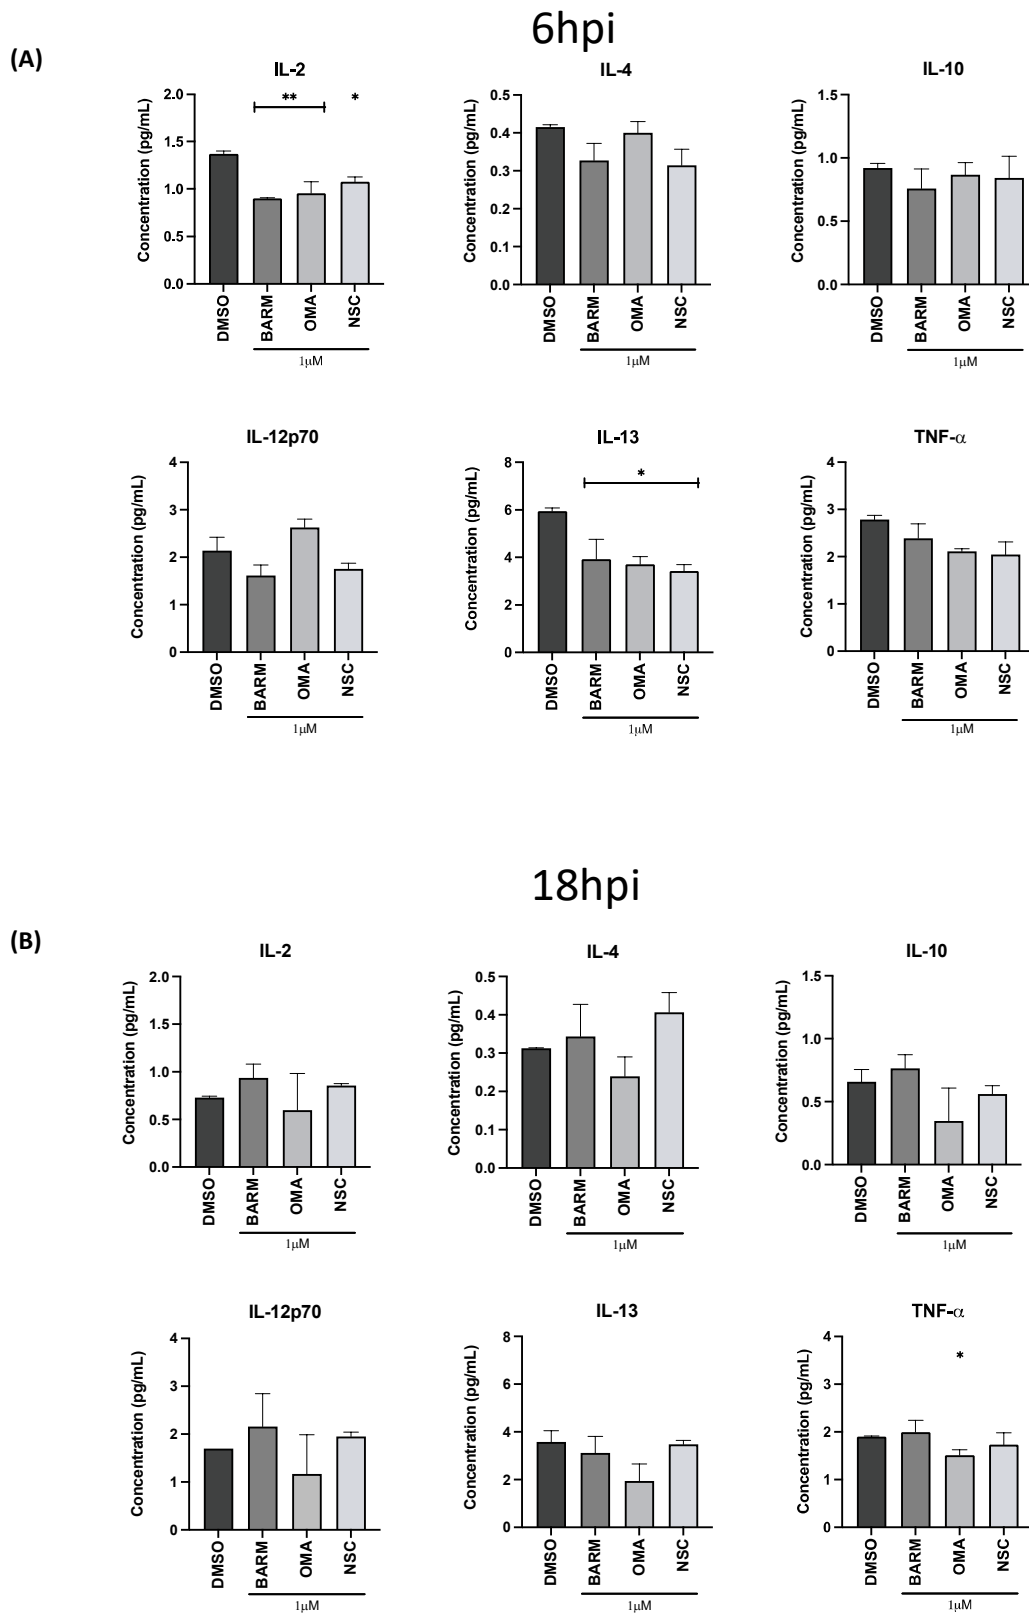

Supplement: s1 [file s1]
